# Supplementary material for: WIP1 Promotes Homologous Recombination and Modulates Sensitivity to PARP Inhibitors
Source: PubMed Central journal article supplement (PMC6830099; doi:10.3390/cells8101258), 2019-10-15
Supplement: cells-08-01258-s001.pdf [file cells-08-01258-s001.pdf]

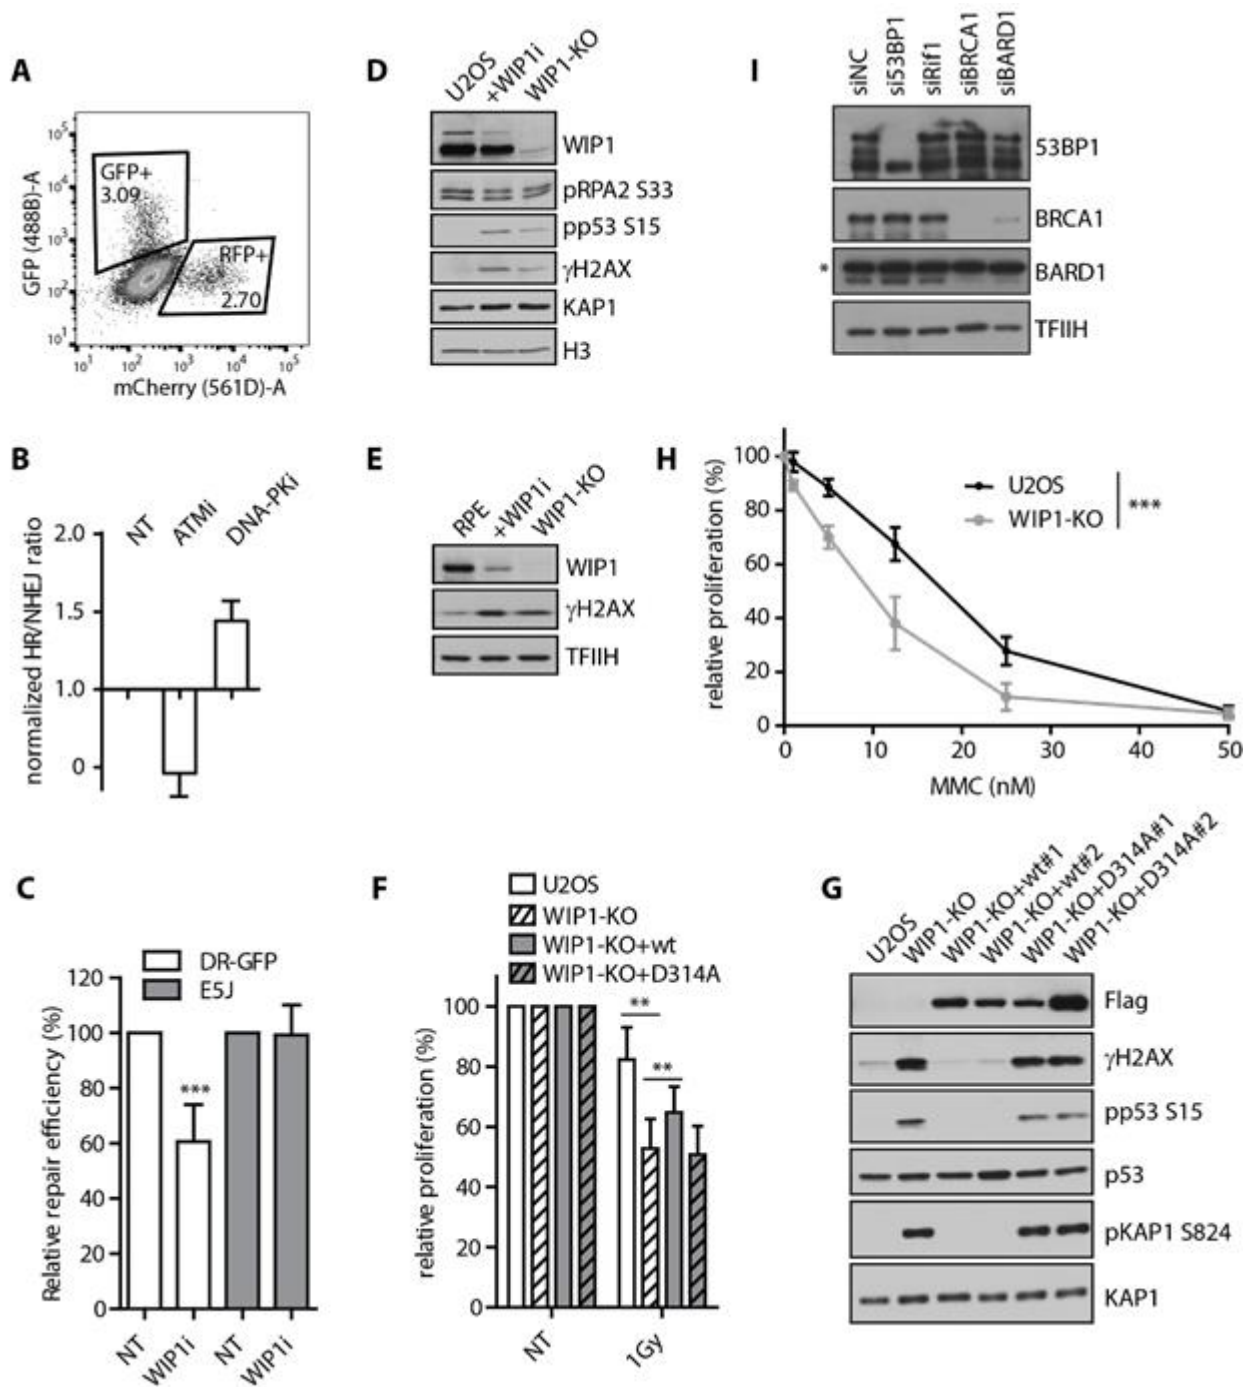

**Supplementary Figure 1. WIP1 inhibition impairs HR and increases sensitivity to DNA damage.**

**A)** Representative dot plot of traffic light reporter in U2OS cell line. Dot plot of BFP-positive single cells showing gating applied to distinguish cells that repaired the break using end-joining (RFP+) or homologous recombination (GFP+). **B)** Cells expressing the traffic light reporter were left non-treated (NT) or incubated with ATM (10  $\mu$ M) or DNA-PK (5  $\mu$ M) inhibitors and the ratio between NHEJ and HR was determined by flow cytometry. **C)** Efficiency of repair of double strand break using different reporter cell lines. Efficiency of repair by homologous recombination (DR-GFP) or end-joining (E5J) was evaluated using different reporter cell lines 3 days after transfection of IScel with or without treatment with 1 $\mu$ M WIP1i. **D)** Western blot analysis of whole cell lysates of U2OS and U2OS-WIP1-KO cells or cells treated with WIP1i for 1h. **E)** Western blot analysis of whole cell lysates of RPE and WIP1 knock-out cells or cells treated with WIP1i for 1h. **F)** Cell survival after irradiation of parental U2OS and U2OS-WIP1-KO cells stably complemented with wild-type or phosphatase-dead (D314A) mutant of WIP1 was evaluated after 7 d using resazurin viability assay. Plotted is mean  $\pm$  SD. Statistical significance evaluated by two tailed t-test. **G)** Western blot analysis of whole cell lysates collected 2 h

after irradiation from F. Two independent complemented clones are shown for wt and D314A WIP1. **H)** Sensitivity of cells to MMC. Relative proliferation of U2OS parental and WIP1 knock-out cells was analyzed using resazurin 7 d after treatment with indicated doses of MMC. Plotted is mean and SD,  $n \geq 3$ . Statistical significance evaluated by two-way ANOVA ( $***P < 0.001$ ). **I)** Western blot analysis of protein depletion after siRNA transfection. Cells were harvested 2 days after transfection with indicated siRNAs and analyzed using Western blotting with indicated antibodies. Asterisk indicates an unspecific band recognized by BARD1 antibody.

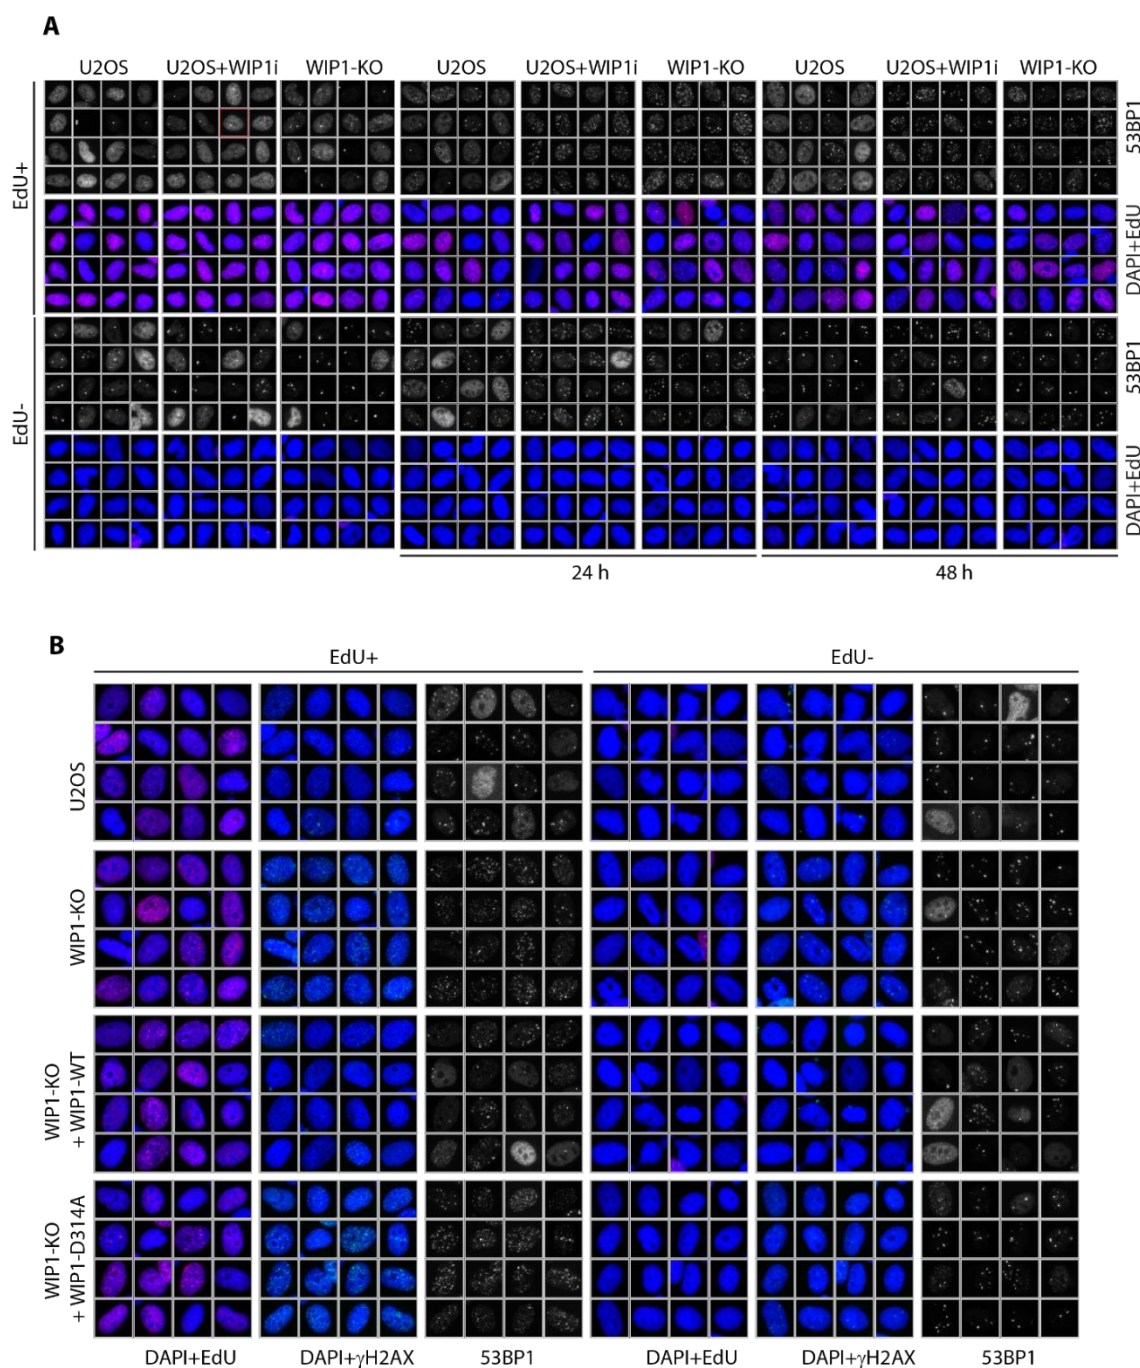

**Supplementary figure 2.** Loss of WIP1 delays removal of 53BP1 foci in U2OS cells.

**A)** Representative images from experiments shown in Figure 2 A and 2 B. **B)** Representative images from experiments shown in Figure 2 C and 2 D.

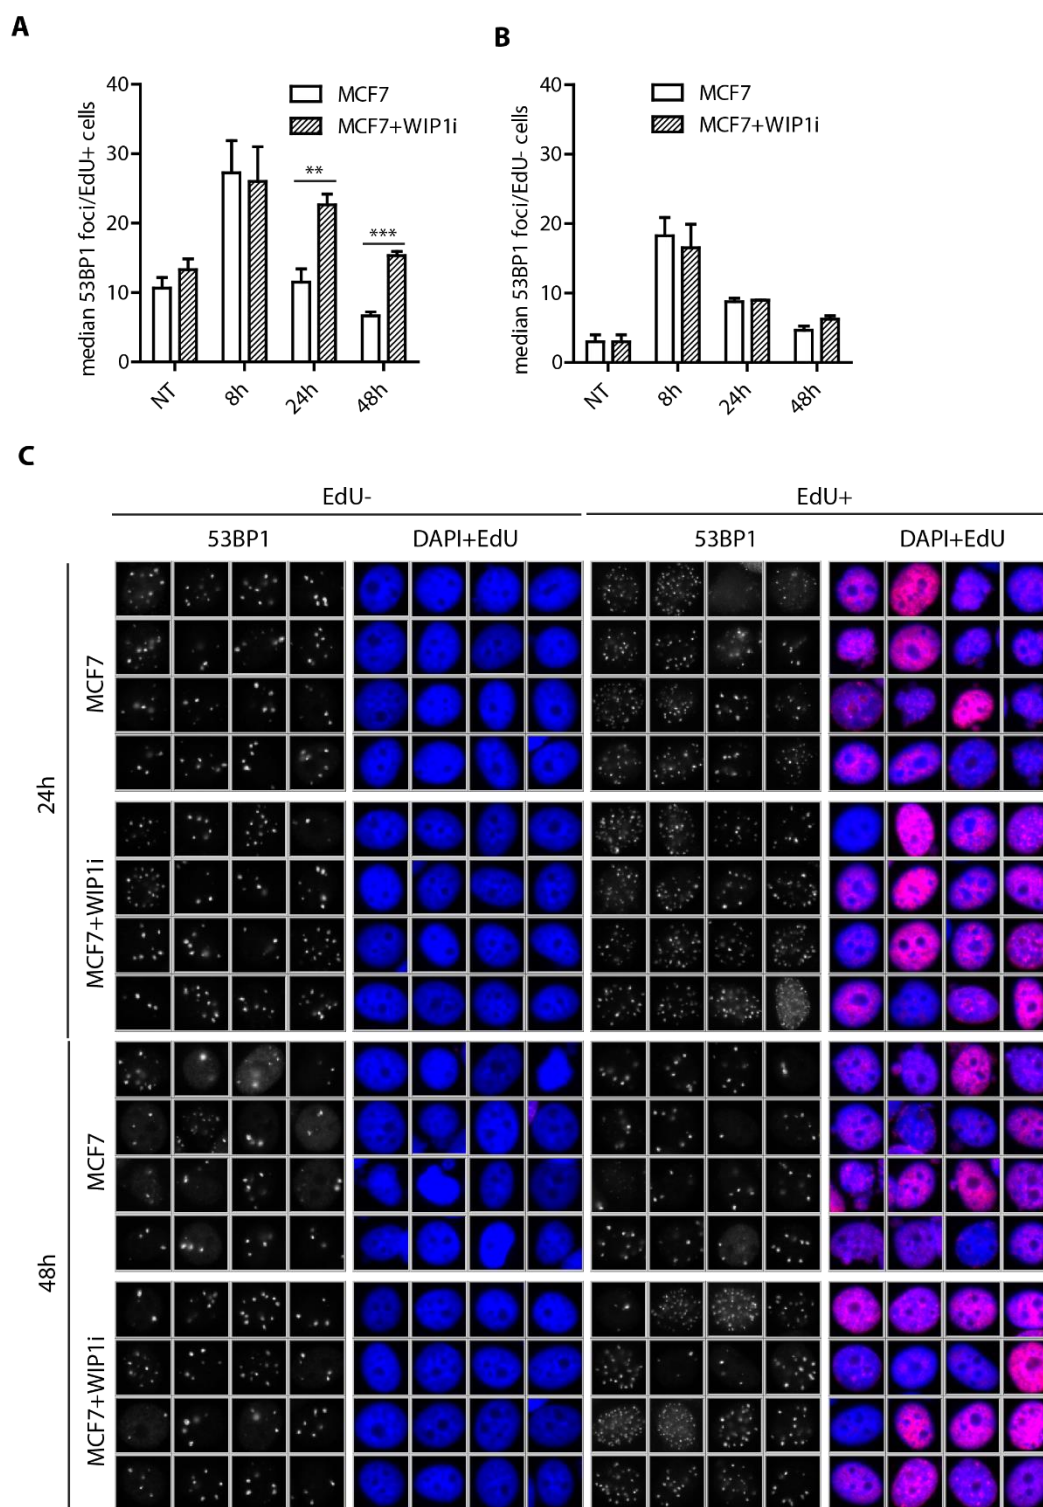

**Supplementary figure 3.** WIP1 inhibition delays removal of 53BP1 foci in MCF7 cells.

**A)** Quantification of 53BP1 foci in replicating (EdU+) cells after irradiation. MCF7 cells with or without combined treatment with WIP1i were pulse-labelled with EdU for 30 minutes before irradiation. Cells were fixed after pre-extraction at indicated time-points and stained with  $\gamma$ H2AX and 53BP1 antibodies. Click chemistry was used to visualize EdU. Mean of median foci number  $\pm$  SD is plotted. Statistical significance evaluated by two tailed t-test. **B)** Quantification of 53BP1 foci in non-replicating (EdU-) cells after irradiation. As in B. **C)** Representative images from A and B.



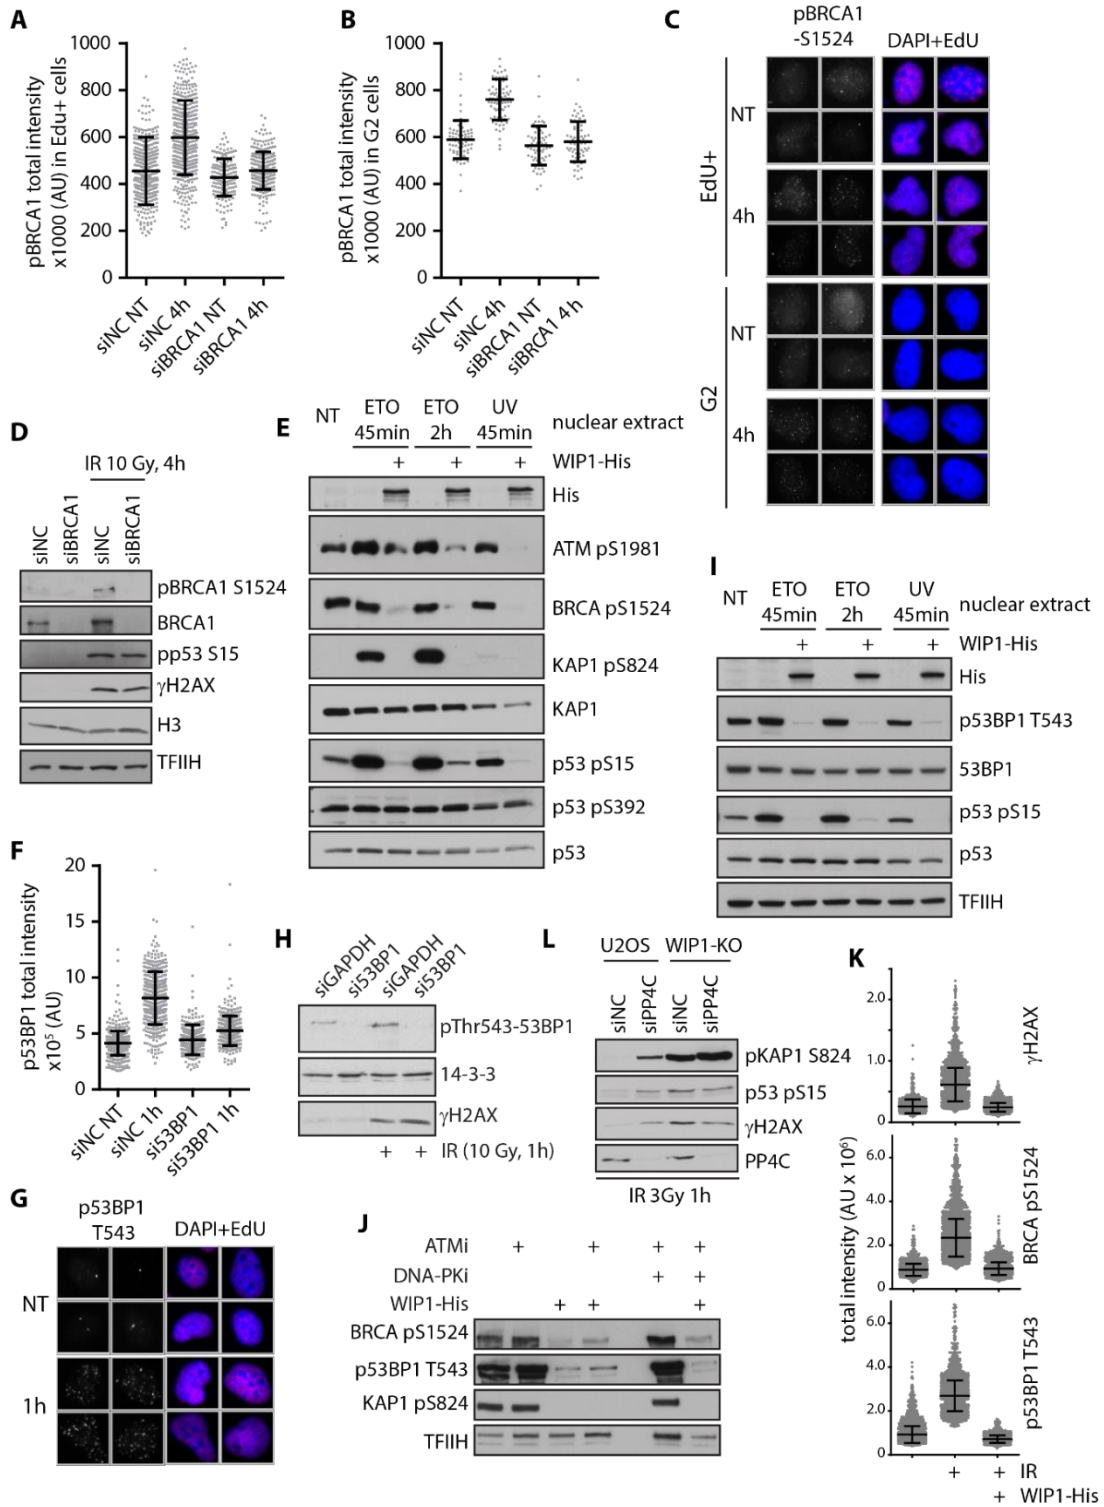

**Supplementary figure 4.** WIP1 dephosphorylates BRCA1 and 53BP1 *in vitro* and *in situ*.

**A)** Validation of pBRCA1 S1524 antibody for immunofluorescence in replicating (EdU+) cells. U2OS cells were transfected with NC or BRCA1 siRNA and after 2 days were pulse-labelled with EdU for 30 min and irradiated. After 4 h, cells were fixed after pre-extraction at indicated time-points and stained with pBRCA1 S1524 antibody. Click chemistry was used to visualize EdU. Single cell intensities and mean +/- SD from representative experiment is plotted. **B)** Validation of pBRCA1 S1524 antibody for immunofluorescence in G2 (4n, EdU-) cells. **C)** Representative examples of pBRCA1 S1524 staining from A and B. **D)** Validation of pBRCA1 S1524 antibody

by Western Blotting. U2OS cells were irradiated 2 d after transfection with NC or BRCA1 siRNA and whole cell lysates were analyzed by Western blotting with indicated antibodies. **E)** *In vitro* phosphatase assay using nuclear extracts. Nuclear extracts from untreated U2OS-WIP1-KO cells or after indicated treatments were incubated with purified His-WIP1 at 37°C for 30 min. Reactions were stopped by addition of 4x sample buffer and analyzed by Western Blotting using indicated antibodies. **F)** Validation of p53BP1 T543 antibody for immunofluorescence in replicating (EdU+) cells. U2OS cells were transfected with NC or 53BP1 siRNA and after 2 days were pulse-labelled with EdU for 30 min and irradiated. Cells were fixed after pre-extraction at indicated time-points and stained with p53BP1 T543 antibody. Click chemistry was used to visualize EdU. Single cell intensities and mean  $\pm$  SD from representative experiment is plotted. **G)** Representative examples of p53BP1 T543 staining from F. **H)** Validation of p53BP1 T543 antibody for Western Blotting. U2OS cells were transfected with indicated siRNAs and irradiated 2 days later with 10 Gy. Whole cell lysates were analyzed by Western blotting with indicated antibodies. **I)** *In vitro* phosphatase assay using nuclear extracts. Nuclear extracts prepared from untreated U2OS-WIP1-KO cells or after indicated treatments were incubated with purified His-WIP1 at 37°C for 30 min. Reactions were stopped by addition of 4x sample buffer and analyzed by Western Blotting using indicated antibodies. **J)** *In vitro* phosphatase assay using nuclear extracts was performed as in E. Reaction was performed in the presence of DMSO, or ATM (10  $\mu$ M) and DNA-PK (5  $\mu$ M) inhibitors. **K)** In situ phosphatase assay. U2OS cells were fixed after exposure to IR, permeabilized, incubated or not with 600 ng of WIP1-His for 30 min at RT and stained for indicated antibodies. Single cell intensities and mean  $\pm$  SD from representative experiment is plotted. **L)** Immunoblotting of samples from Figure 4 E.

**A**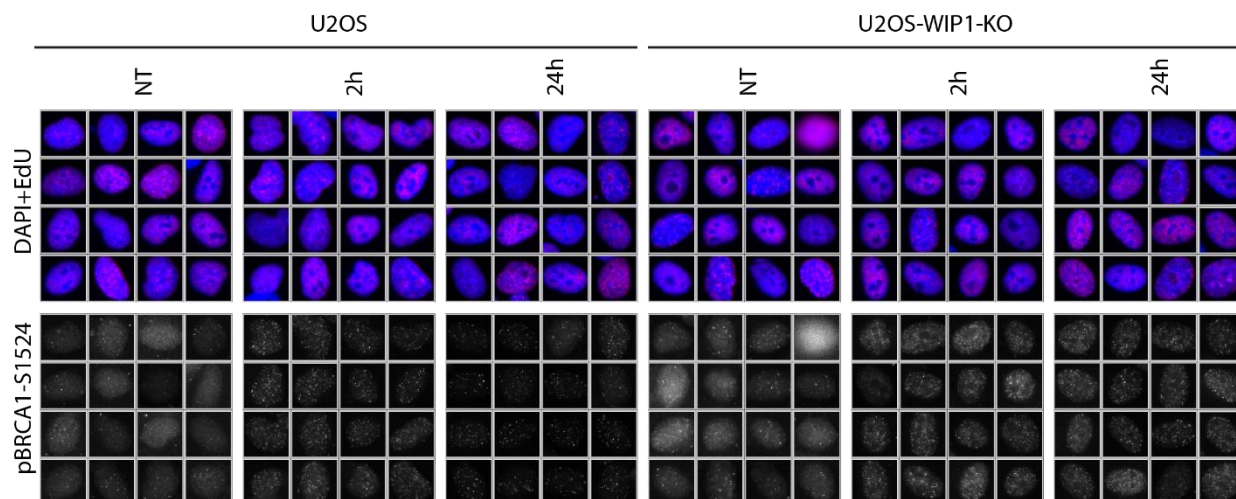**B**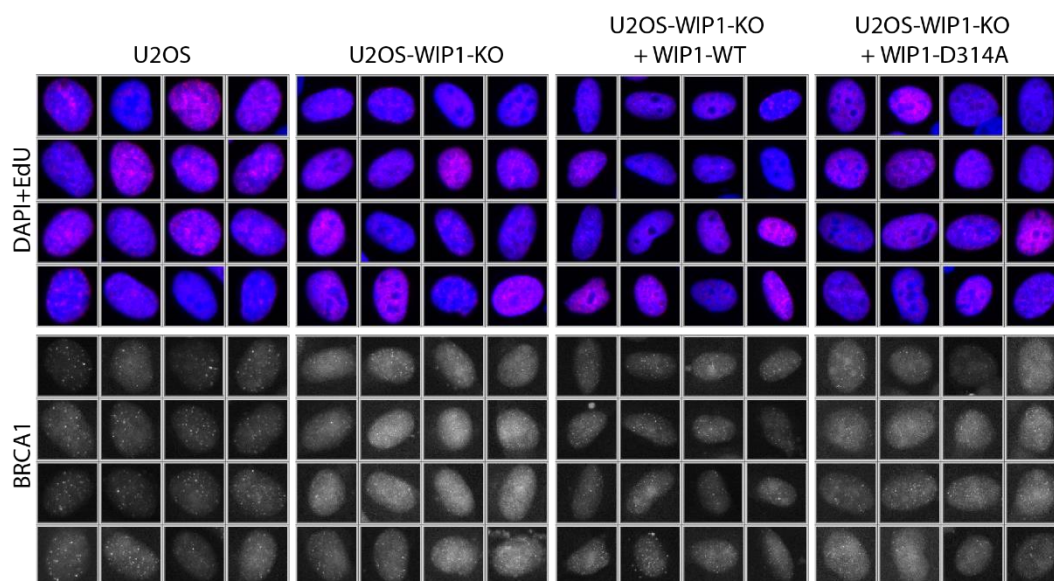

**Supplementary figure 5.** Loss of WIP1 increases BRCA1 phosphorylation at S1524.

**A)** Representative images from experiments shown in Figure 3 D. Shown are non-treated cells (NT) and time interval 2 and 24 h after exposure of cells to IR. **B)** Representative images from the complementation assay in Figure 3 G. Shown is the time interval 2 h after exposure of cells to IR.

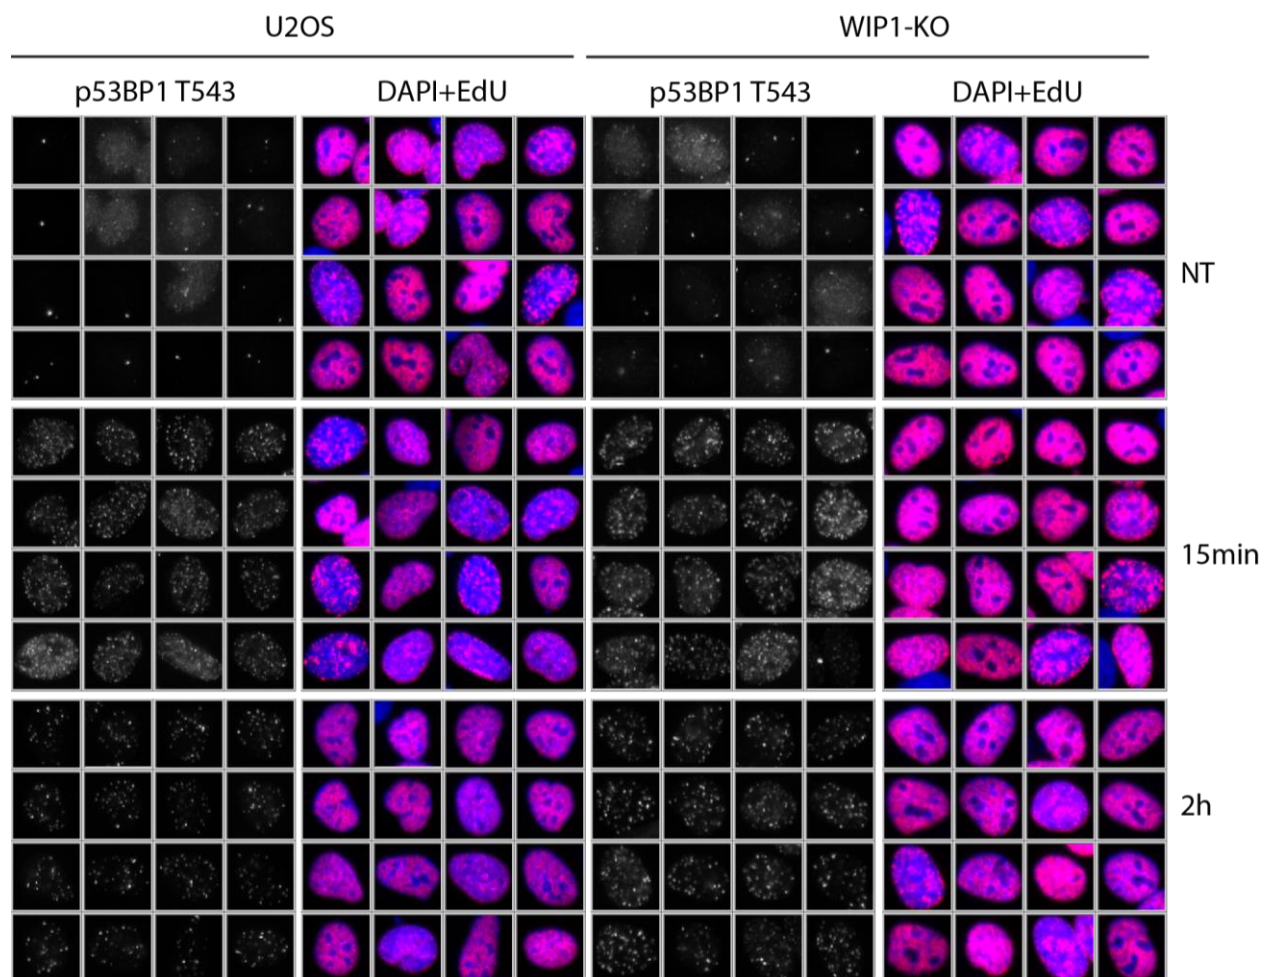

**Supplementary Figure 6.** Loss of WIP1 increases IR-induced phosphorylation of 53BP1at T543.

Representative images from experiments shown in Figure 4 C

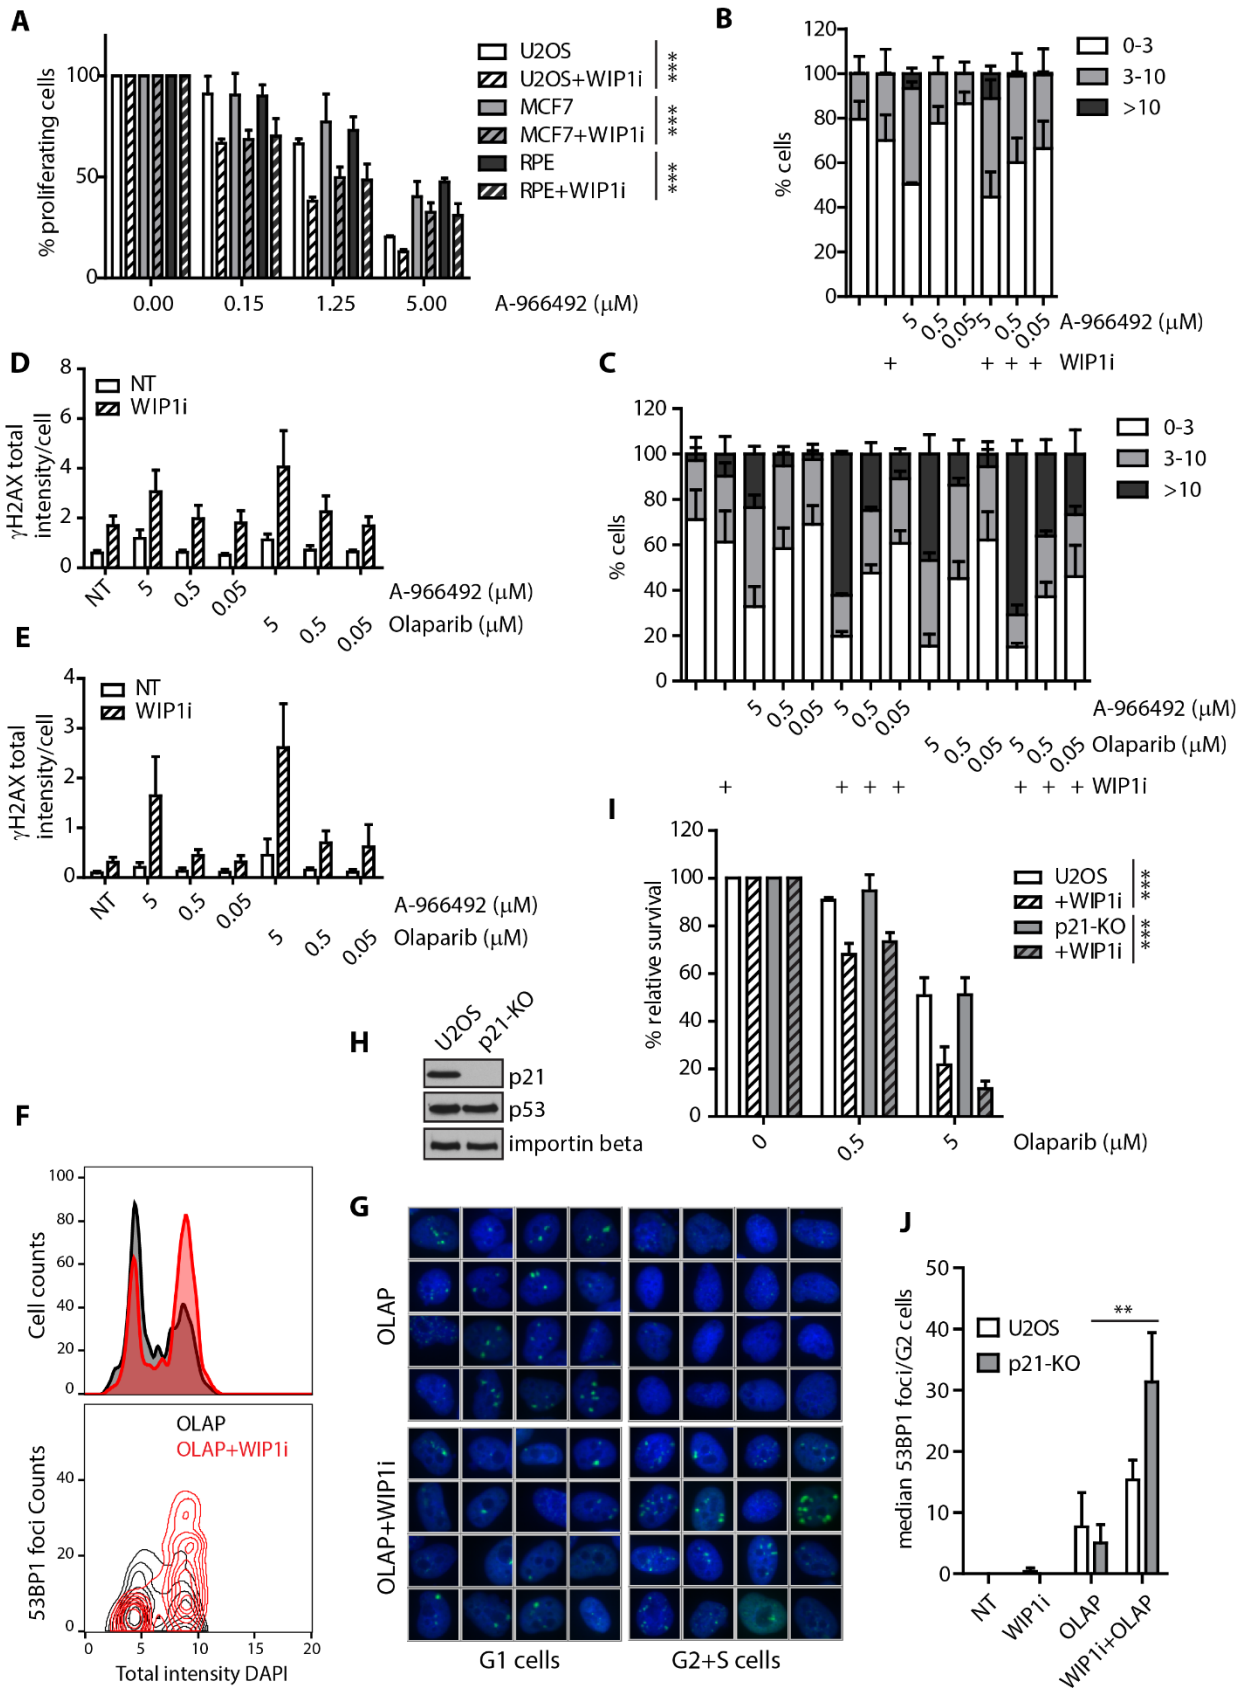

**Supplementary Figure 7.** Inhibition of WIP1 potentiates DNA damage induced by olaparib.

**A)** Cell survival of U2OS, MCF7 and RPE cell lines with or without combined treatment with WIP1i was evaluated 7 days after treatment with indicated doses of A-966492 using resazurin viability assay. Plotted is mean +/- SD, n≥3. Statistical significance evaluated by two-way ANOVA. **B)** Quantification of 53BP1 foci number



after treatment with A-966492. U2OS cells were treated with indicated doses of PARPi together with or without WIP1i for 3 days, fixed, stained with 53BP1 antibody and percentages of cells having 0-3, 3-10 and >10 foci were quantified. Bars indicate SD,  $n \geq 3$ . **C)** Quantification of 53BP1 foci number in MCF7 cells after treatment with PARP inhibitors as in B. **D)** Quantification of  $\gamma$ H2AX intensity after treatment with PARP inhibitors. U2OS cells were treated with indicated doses of PARP inhibitors together with or without WIP1i for 3 days, fixed, stained with  $\gamma$ H2AX antibody and median of the total intensity per cell was quantified. Bars indicate SD,  $n \geq 3$ . **E)** Quantification of  $\gamma$ H2AX intensity in MCF7 cells treated as in D. **F)** Quantification of 53BP1 foci throughout cell cycle. Cell cycle profile and contour plot showing number of 53BP1 foci vs. DAPI 3 days after treatment of U2OS cells with olaparib alone or in combination with WIP1i. Representative plot is shown. **G)** Representative images of the cells from panel F. **H)** Western blot analysis of whole cell lysates from parental U2OS cells and U2OS-p21-KO knock-out cell line. **I)** Cell survival of parental U2OS and U2OS-p21-KO cell lines with or without combined treatment with WIP1i was evaluated 7 days after treatment with indicated doses of olaparib using resazurin viability assay. Plotted is mean  $\pm$  SD,  $n \geq 3$ . Statistical significance evaluated by two-way ANOVA. **J)** Quantification of 53BP1 foci after treatment with olaparib in G2 cells. U2OS and U2OS-p21-KO cells were pulse labelled with EdU after treatment with olaparib together with or without WIP1i for 3 days. Number of 53BP1 foci in G2 (4n, EdU-) cells was quantified.  $n \geq 3$ . Statistical significance evaluated by two tailed t-test.
